# Supplementary material for: Multicountry study protocol of COCOON: COntinuing Care in COVID-19 Outbreak global survey of New, expectant, and bereaved parent experiences
Source: HighWire-hosted journal article supplement (doi:10.1136/bmjopen-2022-061550), 2022-09-01
Supplement: bmjopen-2022-061550supp001_data_supplement.pdf [file bmjopen-2022-061550supp001_data_supplement.pdf]

**Appendix. COCOON country coordinating centres and partners**

| <b>Country</b>   | <b>Coordinating Centre/s</b>                                                                                                                                                                                                                                         | <b>Academic and organisation partners</b>                                                                                                                                                                             |
|------------------|----------------------------------------------------------------------------------------------------------------------------------------------------------------------------------------------------------------------------------------------------------------------|-----------------------------------------------------------------------------------------------------------------------------------------------------------------------------------------------------------------------|
| <b>Argentina</b> | <ul style="list-style-type: none"> <li>• Era En Abril, Buenos Aires</li> </ul>                                                                                                                                                                                       | <ul style="list-style-type: none"> <li>• International Stillbirth Alliance (ISA)</li> </ul>                                                                                                                           |
| <b>Australia</b> | <ul style="list-style-type: none"> <li>• NHMRC Centre of Research Excellence in Stillbirth, Mater Research Institute-University of Queensland (MRI-UQ), Brisbane, Queensland; Australasian Regional Office of the International Stillbirth Alliance (ISA)</li> </ul> | <ul style="list-style-type: none"> <li>• Burnet Institute, Melbourne</li> <li>• Stillbirth Foundation Australia</li> <li>• Red Nose / Sands</li> <li>• Bears of Hope</li> <li>• Raising Children's Network</li> </ul> |
| <b>Brazil</b>    | <ul style="list-style-type: none"> <li>• Hospital Universitário Pedro Ernesto</li> <li>• University of São Paulo, Ribeirão Preto College of Nursing</li> </ul>                                                                                                       | <ul style="list-style-type: none"> <li>• Do luto à luta: Apoio à Perda Gestacional e Neonatal</li> <li>• SobreViver: Apoio à Perda Gestacional ou do Recém-Nascido</li> </ul>                                         |
| <b>Canada</b>    | <ul style="list-style-type: none"> <li>• Paternite Famille et Societe, University of Quebec</li> <li>• The University of British Columbia, Vancouver Canada</li> </ul>                                                                                               | <ul style="list-style-type: none"> <li>• International Stillbirth Alliance (ISA)</li> </ul>                                                                                                                           |
| <b>Germany</b>   | <ul style="list-style-type: none"> <li>• Hannover Medical School</li> <li>• Mother Hood e.V.</li> </ul>                                                                                                                                                              | <ul style="list-style-type: none"> <li>• Schatten &amp; Licht e.V.</li> <li>• Hope's Angels</li> <li>• Telefonseelsorge</li> <li>• Verein Pustebume</li> <li>• Kindsverlust.ch</li> </ul>                             |
| <b>India</b>     | <ul style="list-style-type: none"> <li>• Public Health Foundation of India, Gurugram</li> </ul>                                                                                                                                                                      | <ul style="list-style-type: none"> <li>• International Stillbirth Alliance (ISA)</li> </ul>                                                                                                                           |

|                    |                                                                                                                                                                                                                    |                                                                                                                  |
|--------------------|--------------------------------------------------------------------------------------------------------------------------------------------------------------------------------------------------------------------|------------------------------------------------------------------------------------------------------------------|
|                    | <ul style="list-style-type: none"> <li>• Post Graduate Institute of Medical Education &amp; Research (PGIMER) Chandigarh</li> <li>• Fernandez Hospital Educational &amp; Research Foundation, Hyderabad</li> </ul> |                                                                                                                  |
| <b>Ireland</b>     | <ul style="list-style-type: none"> <li>• Pregnancy Loss Research Group, INFANT Research Centre, University College Cork</li> </ul>                                                                                 | <ul style="list-style-type: none"> <li>• International Stillbirth Alliance (ISA)</li> </ul>                      |
| <b>Italy</b>       | <ul style="list-style-type: none"> <li>• Ciao Lapo Foundation</li> <li>• Perinatal Research Laboratory (PeaRL), University of Florence, NEUROFARBA</li> </ul>                                                      | <ul style="list-style-type: none"> <li>• International Stillbirth Alliance (ISA)</li> </ul>                      |
| <b>Laos</b>        | <ul style="list-style-type: none"> <li>• University of Health Sciences: Faculty of Medical Sciences, Vientiane, Lao People's Democratic Republic</li> </ul>                                                        | <ul style="list-style-type: none"> <li>• Queensland University of Technology (QUT)</li> </ul>                    |
| <b>Netherlands</b> | <ul style="list-style-type: none"> <li>• University Medical Center, Groningen</li> </ul>                                                                                                                           | <ul style="list-style-type: none"> <li>• Kenniscentrum Stille levens</li> <li>• Steunpunt Nova</li> </ul>        |
| <b>New Zealand</b> | <ul style="list-style-type: none"> <li>• Te Herenga Waka Victoria University of Wellington</li> <li>• University of Auckland</li> </ul>                                                                            | <ul style="list-style-type: none"> <li>• Sands</li> <li>• SIDS and Kids NZ</li> </ul>                            |
| <b>Philippines</b> | <ul style="list-style-type: none"> <li>• Far Eastern University</li> <li>• Filipino Nursing Diaspora Network</li> </ul>                                                                                            | <ul style="list-style-type: none"> <li>•</li> </ul>                                                              |
| <b>Spain</b>       | <ul style="list-style-type: none"> <li>• Umamanita Foundation, Girona</li> </ul>                                                                                                                                   | <ul style="list-style-type: none"> <li>• El Parto es Nuestro</li> <li>• La Leche League International</li> </ul> |
| <b>UK</b>          | <ul style="list-style-type: none"> <li>• Department of Women &amp; Children's Health, School of Life Course &amp; Population Sciences, King's College London</li> </ul>                                            | <ul style="list-style-type: none"> <li>• International Stillbirth Alliance (ISA)</li> <li>• Tommy's</li> </ul>   |

---

|    |                                                                                                                                                                                                                                                                    |                                                                                                                |
|----|--------------------------------------------------------------------------------------------------------------------------------------------------------------------------------------------------------------------------------------------------------------------|----------------------------------------------------------------------------------------------------------------|
|    |                                                                                                                                                                                                                                                                    | <ul style="list-style-type: none"><li>• Sands</li><li>• The Lily Mae Foundation</li></ul>                      |
| US | <ul style="list-style-type: none"><li>• NHMRC Centre of Research Excellence in Stillbirth, Mater Research Institute-University of Queensland (MRI-UQ), Brisbane, Queensland; Australasian Regional Office of the International Stillbirth Alliance (ISA)</li></ul> | <ul style="list-style-type: none"><li>• Star Legacy</li><li>• Miss Foundation</li><li>• First Candle</li></ul> |

---

**Note:** Countries ordered alphabetically.
